# Supplementary material
Source: PubMed Central journal article supplement (PMC7728166)
Supplement: NIHMS1648737-supplement-Supp__Figs_1-3.pdf [file NIHMS1648737-supplement-Supp__Figs_1-3.pdf]

## Supplemental Figure 1

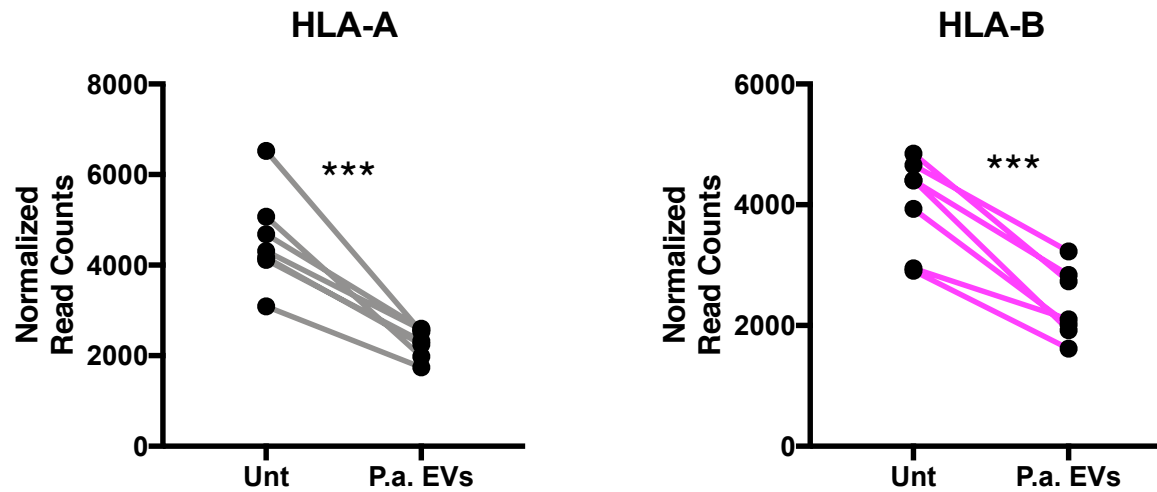

**Supplemental Fig 1. MHC Class I gene expression is suppressed in lung macrophages with 48 hour *P.a.* EV treatment.** NanoString nCounter gene expression assay utilizing the cancer/immune panel of 770 genes was used to measure MHC Class I gene expression. *HLA-A* and *HLA-B* mRNA was diminished post EV-treatment. \*\*\*  $P < 0.001$ .

## Supplemental Figure 2

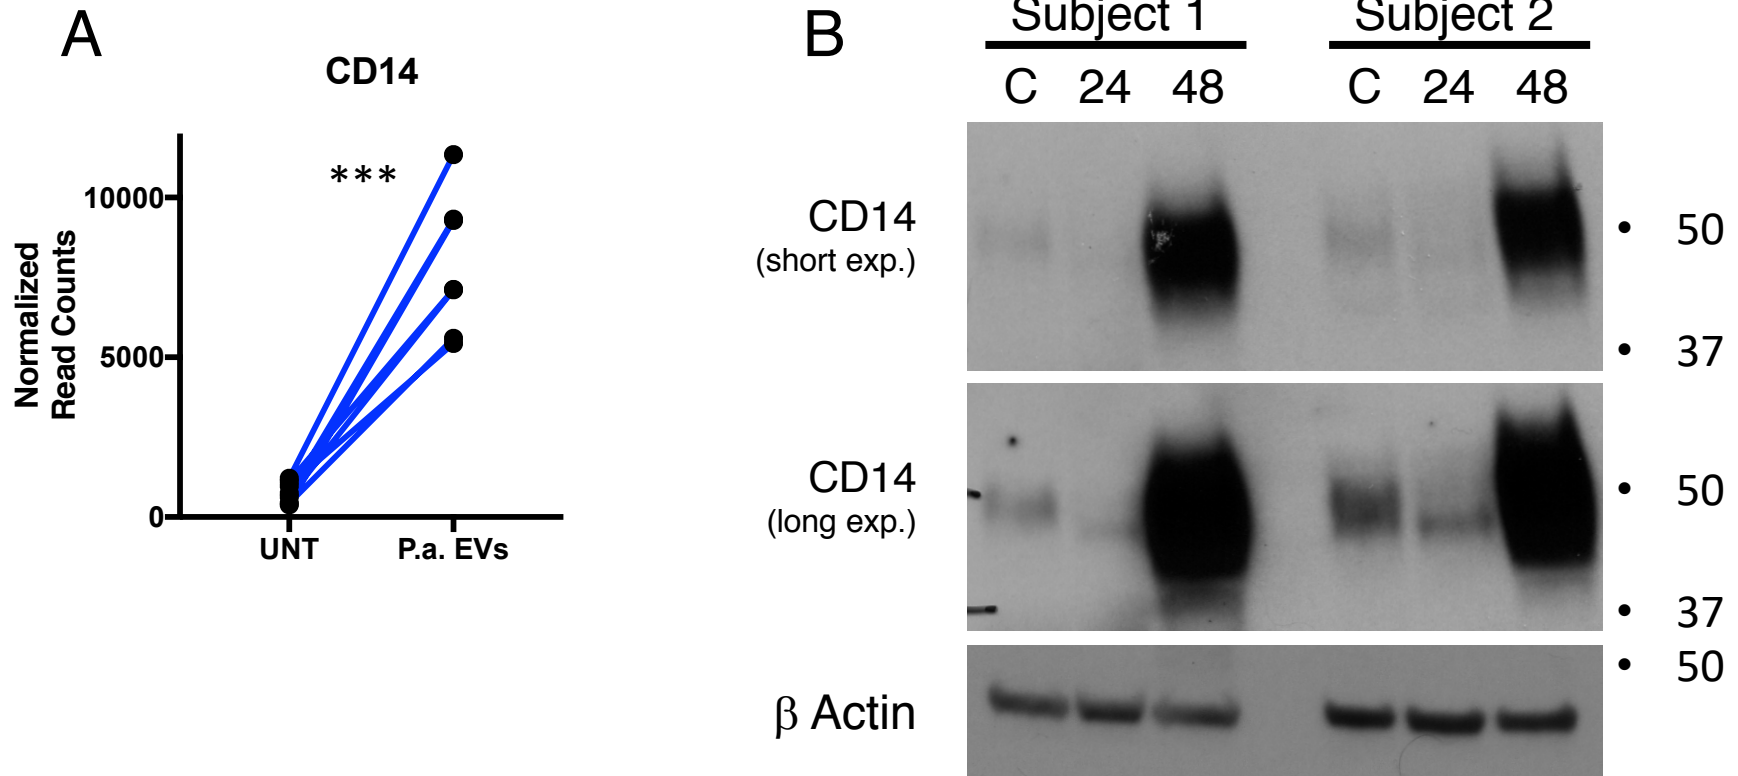

**Supplemental Figure 2. Gene expression and protein expression on CD14 in lung macrophages increases with *P. aeruginosa* EV treatment.**

CD14 gene expression in lung macrophages from all subjects (n=7) increases with P.a. EV-treatment (A). Protein expression increase at 48 hours confirms and validates mRNA measurement (B).\*\*\*P < 0.001.

# Supplemental Figure 3

## Chromosome 6

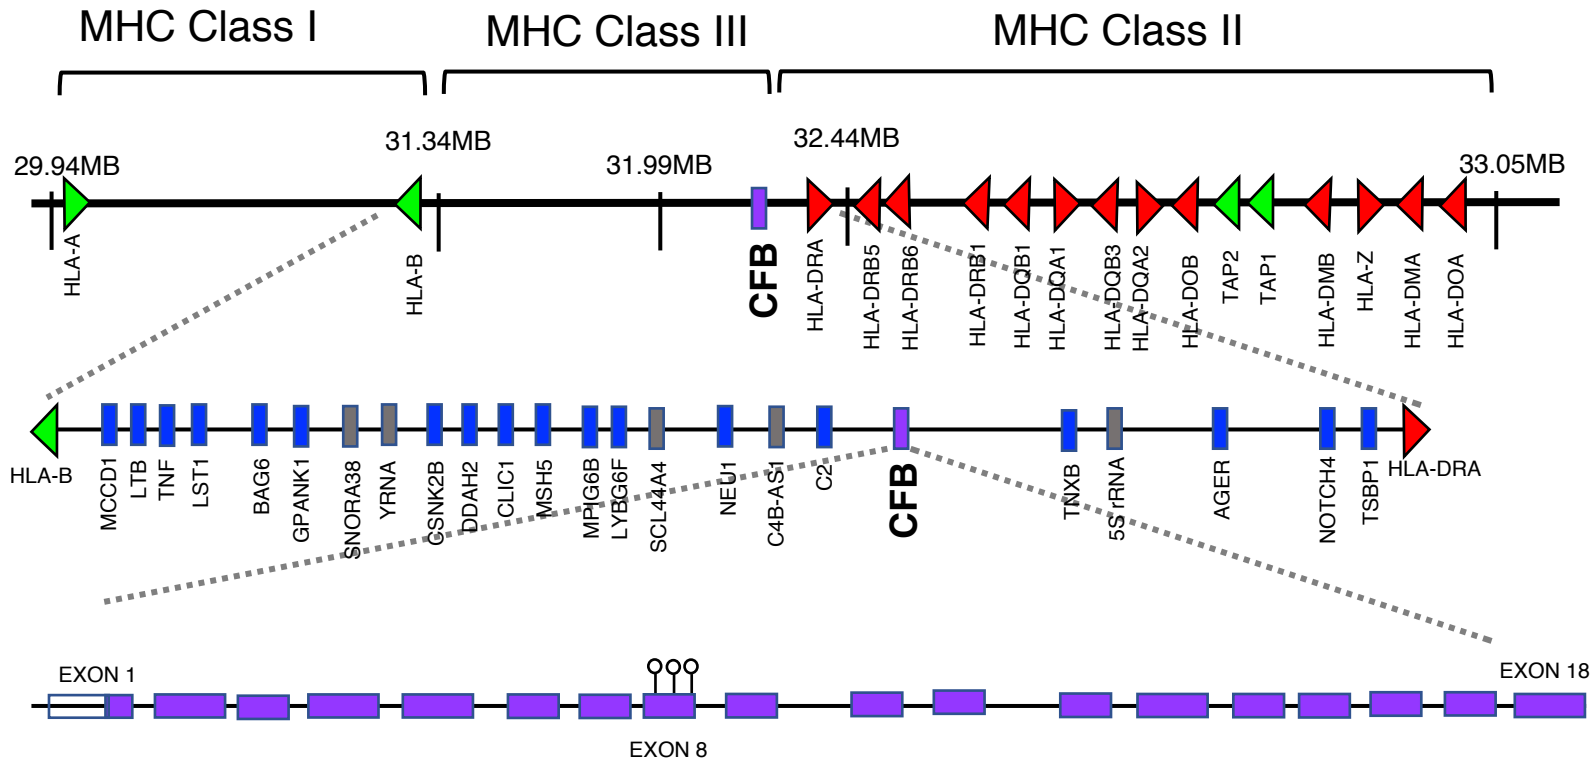

**Supplemental Figure 3. Schematic representation of MHC gene clustering on chromosome 6.** MHC class I genes, in general are situated more toward 5' end of chromosome 6 segment and class II genes situated more 3' on chromosome 6. *Complement factor B (CFB)*, one of approximately 60 MHC class III genes is situated directly in between class I & II. Schematic shows examples of genes contained in this MHC class III region of chromosome 6 (not all inclusive or to exact scale). *CFB* contains 18 exons. The three CpGs identified as significantly hypomethylated are located in exon 8 of the *CFB* gene.
